# Supplementary material for: A transparent and robust ionogel prepared via phase separation for sensitive strain sensing
Source: Royal Society of Chemistry journal article supplement (doi:10.1039/d4ta02305f), 2024-01-01
Supplement: d4ta02305f1.pdf [file d4ta02305f1.pdf]

1 **Supplementary Information**  
2 **A Transparent and Robust Ionogel Prepared via Phase**  
3 **Separation for Sensitive Strain Sensing**

4 *Jinliang Xie<sup>1&</sup>, Xiaoqian Li<sup>2&</sup>, Jiayu Liu<sup>1</sup>, Fangfang Su<sup>1</sup>, Ruiqi Gao<sup>3</sup>, Changming Zhang<sup>3</sup>, Jiahe*  
5 *Liang<sup>2</sup>, Gang Ji<sup>\*3</sup>, Dongdong Yao<sup>\*1</sup>, Yaping Zheng<sup>1</sup>*

6 <sup>1</sup> School of Chemistry and Chemical Engineering, Northwestern Polytechnical University Xi'an,  
7 Shaanxi 710072, P. R. China;

8 <sup>2</sup> 3D Printing Research Center, Department of Ultrasonic Medicine, Tang Du Hospital, Air Force  
9 Medical University, No.569 of Xin Si Road, Xi'an, Shaanxi 710038. P. R. China.

10 <sup>3</sup> Department of Digestive Surgery, Xijing Hospital, Air Force Medical University, Xi'an, Shaanxi  
11 710032. P. R. China.

12 \* Corresponding authors. E-mail: yaodd@nwpu.edu.cn (Dongdong Yao), jigang@fmmu.edu.cn  
13 (Gang Ji).

14

15 **Table of Contents**

16 **1. Supplementary Note**

17 **2. Supplementary Figures**

18 Figure S1. The XRD curves of the P(DMAAm<sub>x</sub>-co-AM<sub>y</sub>) ionogels.

19 Figure S2. Structure models of P(DMAAm<sub>x</sub>-co-AM<sub>y</sub>) ionogels with anneal and dynamic optimized based on  
20 MD calculation.

21 Figure S3. 2D correlation asynchronous spectra of the P(DMAAm<sub>x</sub>-co-AM<sub>y</sub>) ionogels.

22 Figure S4. Rheology analyses of P(DMAAm<sub>40</sub>-co-AM<sub>60</sub>) ionogel.

23 Figure S5. Viscosity-frequency curves of the precursor solution.

24 Figure S6. The tensile stress-strain curves of P(DMAAm<sub>40-co</sub>-AM<sub>60</sub>) ionogel after being placed in different  
25 relative humidity environments for 24 hours.

26 Figure S7. The conductivity of P(DMAAm<sub>40-co</sub>-AM<sub>60</sub>) ionogel after being placed in different relative  
27 humidity environments for 24 hours.

28 Figure S8. The process of programmed box-shaped P(DMAAm<sub>40-co</sub>-AM<sub>60</sub>) ionogel regaining its initial shape  
29 under heating conditions.

30 Figure S9. Photographs of *E. coli* bacterial colonies upon treatment with P(DMAAm<sub>x-co</sub>-AM<sub>y</sub>) ionogel.

### 31 **3. Supplementary tables**

32 Table S1. Transparency and characteristic temperature of the P(DMAAm<sub>x-co</sub>-AM<sub>y</sub>) ionogels.

33 Table S2. Mechanical properties of the P(DMAAm<sub>x-co</sub>-AM<sub>y</sub>) ionogels.

34 Table S3. The mechanical properties of reported high strength gel materials.

35 Table S4. Tensile properties and conductivity of P(DMAAm<sub>40-co</sub>-AM<sub>60</sub>) ionogel under different humidity  
36 environments.

37 Table S5. Comparison of sensing performance of gel-based flexible strain sensors.

### 38 **4. Reference**

39

40 **Supplementary Note 1**

41     **Antibacterial activity:** *E. coli* (ATCC25922, Gram-negative) were used to evaluate the  
42 antibacterial performances of the composite ionogels. Bacteria were cultured in Luria-Bertani (LB)  
43 broth at 37 °C, with continuous shaking at 150 rpm overnight, and then diluted for further use.  
44 Briefly, 100 µL bacterial suspension ( $10^5$  CFU/mL) was spread on the agar plate, followed by the  
45 addition of the composite ionogels and incubation at 37 °C for 24 h. Subsequently, the agar plate  
46 was incubated at 37 °C for 24 h and then the diameter of the inhibition zone around the hydrogel  
47 was measured.

48

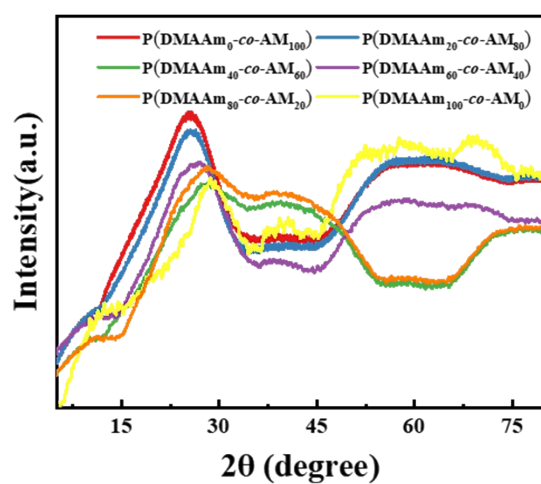

49

50 **Figure S1.** The XRD curves of the P(DMAAm<sub>x</sub>-co-AM<sub>y</sub>) ionogels.

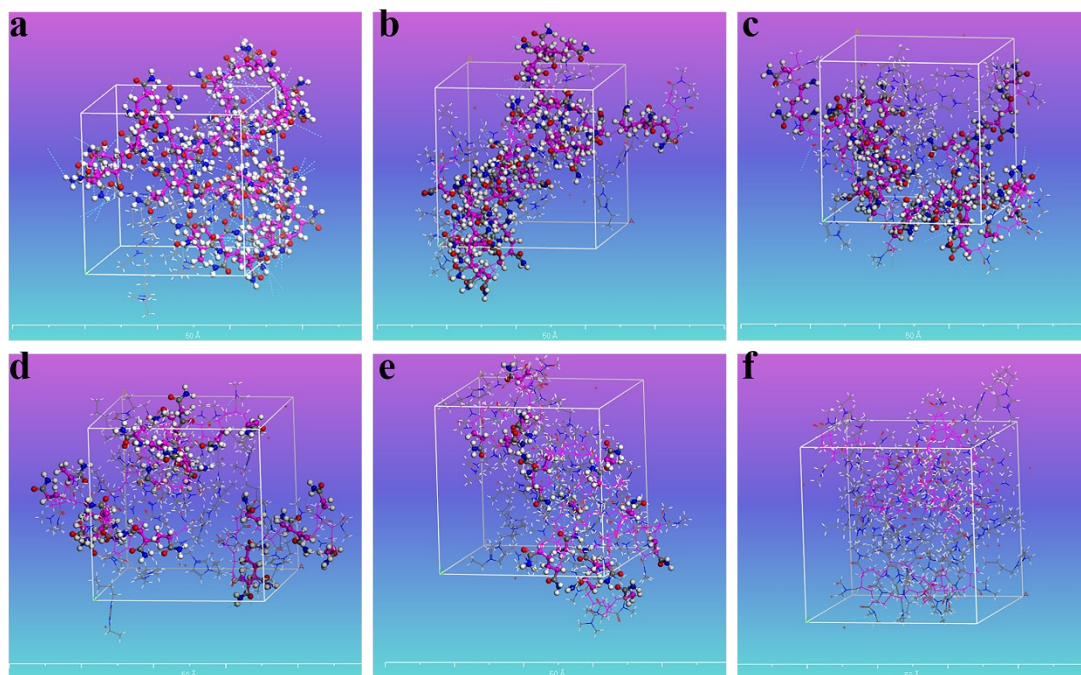

51

52 **Figure S2.** Structure models of P(DMAAm<sub>x</sub>-co-AM<sub>y</sub>) ionogels with anneal and dynamic optimized  
 53 based on MD calculation. (a) P(DMAAm<sub>0</sub>-co-AM<sub>100</sub>) ionogel, (b) P(DMAAm<sub>20</sub>-co-AM<sub>80</sub>) ionogel,  
 54 (c) P(DMAAm<sub>40</sub>-co-AM<sub>60</sub>) ionogel, (d) P(DMAAm<sub>60</sub>-co-AM<sub>40</sub>) ionogel, (e) P(DMAAm<sub>80</sub>-co-  
 55 AM<sub>20</sub>) ionogel, (f) P(DMAAm<sub>100</sub>-co-AM<sub>0</sub>) ionogel.

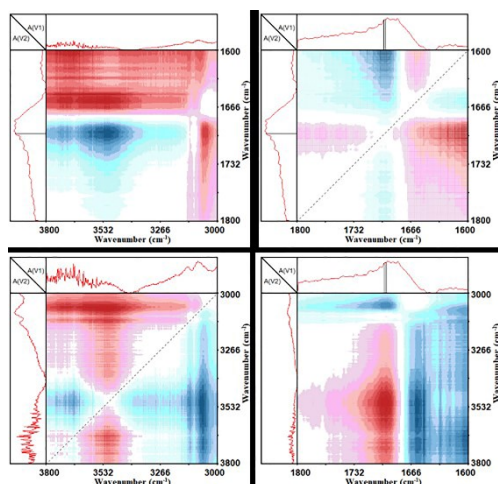

56

57 **Figure S3.** 2D correlation asynchronous spectra of the P(DMAAm<sub>40</sub>-co-AM<sub>60</sub>) ionogel.

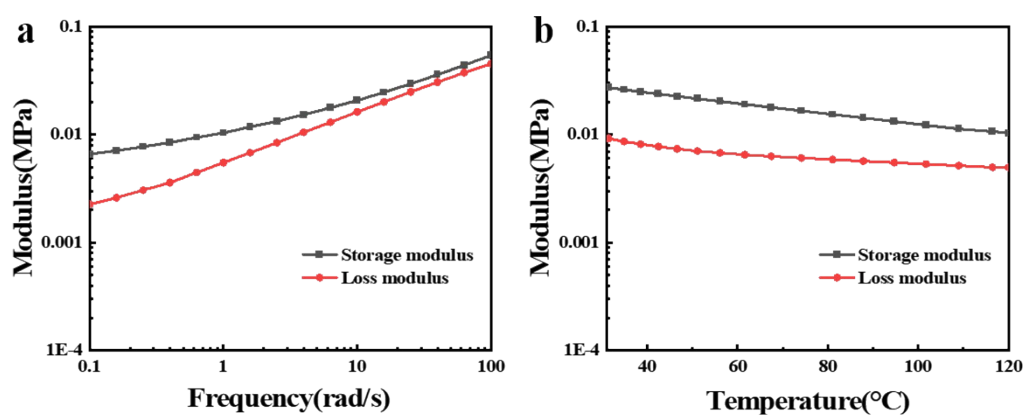

58

59 **Figure S4.** Rheology analyses of P(DMAAm<sub>40</sub>-co-AM<sub>60</sub>) ionogel. (a) Modulus-frequency

60 relationship curves, (b) Modulus-temperature relationship curves.

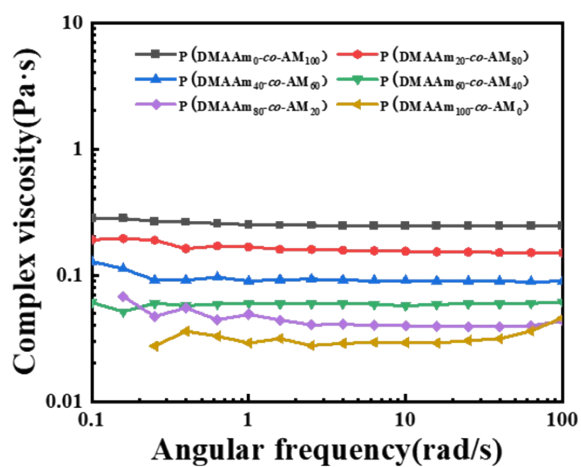

61

62 **Figure S5.** Viscosity-frequency curves of the precursor solution.

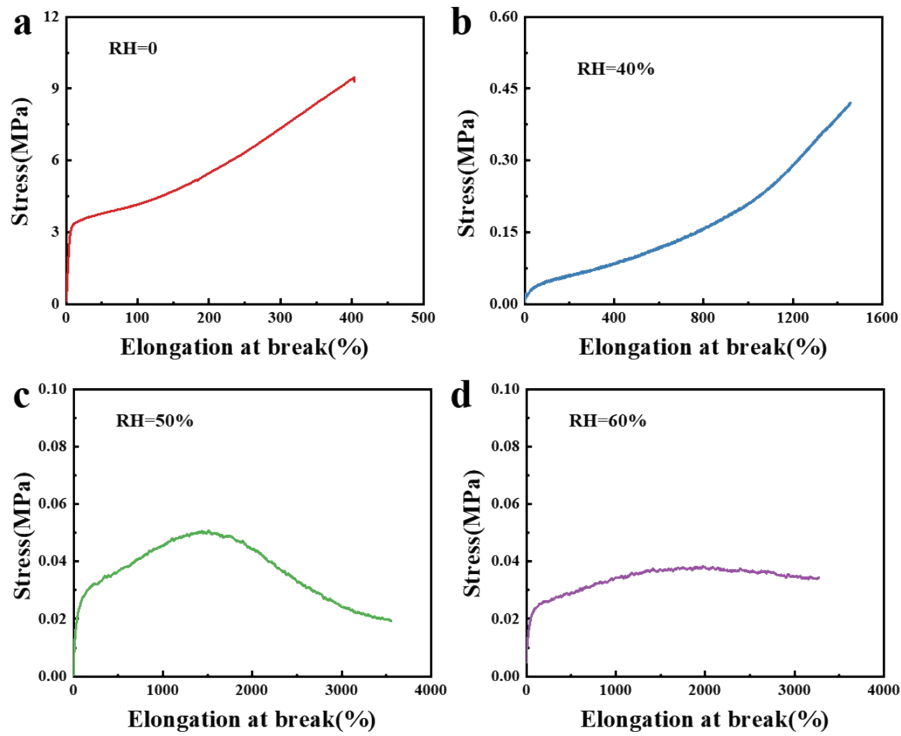

63

64 **Figure S6.** The tensile stress-strain curves of P(DMAAm<sub>40</sub>-co-AM<sub>60</sub>) ionogel after being placed  
 65 in different relative humidity environments for 24 hours, (a) dry environment, (b) 40%, (c) 50%,  
 66 (d) 60%.

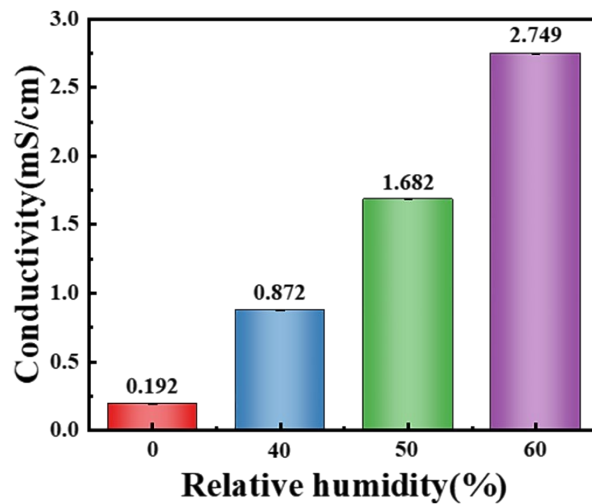

67

68 **Figure S7.** The conductivity of P(DMAAm<sub>40</sub>-co-AM<sub>60</sub>) ionogel after being placed in different  
 69 relative humidity environments for 24 hours.

70

71

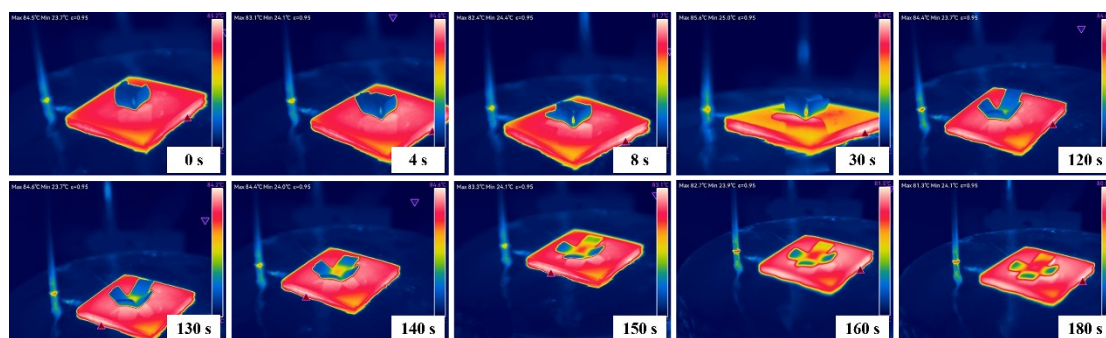

72

73 **Figure S8.** The process of programmed box-shaped P(DMAAm<sub>40</sub>-co-AM<sub>60</sub>) ionogel regaining its

74 initial shape under heating conditions.

75

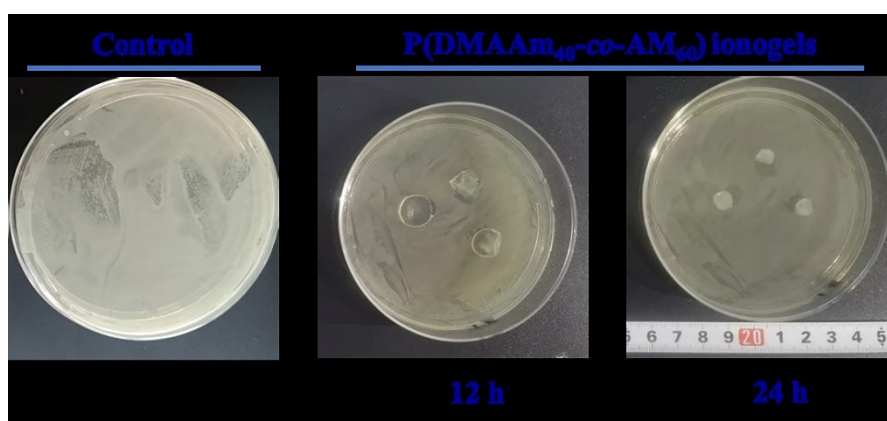

76

77 **Figure S9.** Photographs of *E. coli* bacterial colonies upon treatment with P(DMAAm<sub>x</sub>-co-AM<sub>y</sub>)

78 ionogel.

79 Additionally, *E. coli* (ATCC25922, Gram-negative) were used to evaluate the antibacterial

80 performances of the P(DMAAm<sub>40</sub>-co-AM<sub>60</sub>) ionogel. The ionogel samples of a certain volume were

81 placed onto solid nutrient agar coated with a suspension of *E. coli* bacteria at 37 °C for 12 hours and

82 24 h. However, the ionogel have no obvious antibacterial properties.

83

84 **Table S1.** Transparency and characteristic temperature of the P(DMAAm<sub>x</sub>-co-AM<sub>y</sub>) ionogels.

| Sample                                       | Transparency (%) | T <sub>g</sub> (°C) <sup>a</sup> | T <sub>d</sub> (°C) <sup>b</sup> | T <sub>d fast</sub> (°C) <sup>c</sup> |
|----------------------------------------------|------------------|----------------------------------|----------------------------------|---------------------------------------|
| P(DMAAm <sub>0</sub> -co-AM <sub>100</sub> ) | 89.6             | >60                              | 263                              | 311                                   |
| P(DMAAm <sub>20</sub> -co-AM <sub>80</sub> ) | 90.5             | 50.7                             | 263                              | 318                                   |
| P(DMAAm <sub>40</sub> -co-AM <sub>60</sub> ) | 94.0             | 26.2                             | 263                              | 310                                   |
| P(DMAAm <sub>60</sub> -co-AM <sub>40</sub> ) | 95.2             | 9.4                              | 263                              | 315                                   |
| P(DMAAm <sub>80</sub> -co-AM <sub>20</sub> ) | 96.5             | -2.2                             | 263                              | 321                                   |
| P(DMAAm <sub>100</sub> -co-AM <sub>0</sub> ) | 98.3             | <-40                             | 263                              | 311                                   |

85 a. T<sub>g</sub> represents the glass transition temperature; b. T<sub>d</sub> represents the decomposition temperature; c. T<sub>d fast</sub> represents

86 the fastest decomposition temperature.

87 **Table S2.** Mechanical properties of the P(DMAAm<sub>x</sub>-co-AM<sub>y</sub>) ionogels.

| Sample                                       | Tensile strength (MPa) | Elongation at break (%) | Modulus (MPa) | Toughness (MJ/m <sup>3</sup> ) |
|----------------------------------------------|------------------------|-------------------------|---------------|--------------------------------|
| P(DMAAm <sub>0</sub> -co-AM <sub>100</sub> ) | 11.83                  | 6.82                    | 152.70        | 0.56                           |
| P(DMAAm <sub>20</sub> -co-AM <sub>80</sub> ) | 9.07                   | 297.07                  | 127.83        | 21.46                          |
| P(DMAAm <sub>40</sub> -co-AM <sub>60</sub> ) | 8.94                   | 404.46                  | 51.55         | 21.95                          |
| P(DMAAm <sub>60</sub> -co-AM <sub>40</sub> ) | 5.55                   | 614.18                  | 5.44          | 15.44                          |
| P(DMAAm <sub>80</sub> -co-AM <sub>20</sub> ) | 2.25                   | 1262.10                 | 0.31          | 11.64                          |
| P(DMAAm <sub>100</sub> -co-AM <sub>0</sub> ) | 0.113                  | 1319.06                 | 0.0245        | 0.65                           |

88



90 **Table S3.** The mechanical properties of reported high strength gel materials.

| No. | Strength<br>(MPa) | Modulus<br>(MPa) | Toughness<br>(MJ·m <sup>-3</sup> ) | Type                                                        |
|-----|-------------------|------------------|------------------------------------|-------------------------------------------------------------|
| 1   | 3.64              | 0.46             | 27.60                              | Hydrogel <sup>1</sup>                                       |
| 2   | 5.60              | 1.30             | --                                 | Hydrogel <sup>2</sup>                                       |
| 3   | 3.10              | 0.60             | 8.65                               | Hydrogel <sup>3</sup>                                       |
| 4   | 1.36              | 0.49             | --                                 | Hydrogel <sup>4</sup>                                       |
| 5   | 2.00              | --               | 22.00                              | Hydrogel <sup>5</sup>                                       |
| 6   | 2.70              | 1.17             | 10.80                              | Hydrogel <sup>6</sup>                                       |
| 7   | 2.20              | 0.27             | --                                 | Hydrogel <sup>7</sup>                                       |
| 8   | 2.70              | 0.82             | 8.50                               | Hydrogel <sup>8</sup>                                       |
| 9   | 9.30              | 277.00           | 0.40                               | Hydrogel <sup>9</sup>                                       |
| 10  | 20.20             | 16.10            | 62.70                              | DES gel <sup>10</sup>                                       |
| 11  | 3.19              | 2.35             |                                    | DES gel <sup>11</sup>                                       |
| 12  | 5.19              | 0.20             | --                                 | PU-IL ionogel <sup>12</sup>                                 |
| 13  | 2.52              | 1.43             | 2.55                               | PU-IL ionogel <sup>13</sup>                                 |
| 14  | 22.00             | --               | 109.80                             | PU-IL ionogel <sup>14</sup>                                 |
| 15  | 4.99              | 1.71             | --                                 | PU-IL ionogel <sup>15</sup>                                 |
| 16  | 1,65              | 0.28             | --                                 | PU-IL ionogel <sup>16</sup>                                 |
| 17  | 9.15              | 1.12             | 178.46                             | BC ionogel <sup>17</sup>                                    |
| 18  | 3.70              | 2.46             | 6.25                               | Organic-inorganic ionogel <sup>18</sup>                     |
| 19  | 0.23              | 0.04             | --                                 | PILs ionogel <sup>19</sup>                                  |
| 20  | 2.28              | 2.28             | --                                 | PILs ionogel <sup>20</sup>                                  |
| 21  | 15.00             | 82.81            | --                                 | PILs ionogel <sup>21</sup>                                  |
| 22  | 12.60             | 46.50            | --                                 | P(AA- <i>co</i> -AM) ionogel <sup>22</sup>                  |
| 23  | 7.12              | 0.94             | --                                 | P(IBA- <i>co</i> -MEA) ionogel <sup>23</sup>                |
| 24  | 0.37              | 0.42             | 21.80                              | PAA/CNF ionogel <sup>24</sup>                               |
| 25  | 14.30             | 55.00            | 78.00                              | PDMAA ionogel <sup>25</sup>                                 |
| 26  | 0.90              | 15.60            | 2.48                               | PSHM ionogel <sup>26</sup>                                  |
| 27  | 4.80              | 0.48             | --                                 | PEA ionogel <sup>27</sup>                                   |
| 28  | 7.60              | 58.00            | 25.00                              | PDMAA/MOF ionogel <sup>28</sup>                             |
| 29  | 5.00              | --               | 7.40                               | P(AA- <i>co</i> -HFBA) ionogel <sup>29</sup>                |
| 30  | 0.80              | 1.05             | 5.52                               | P(AA- <i>co</i> -ZDMA) ionogel <sup>30</sup>                |
| 31  | 11.70             | 72.20            | 37.50                              | PVDF- <i>co</i> -HFP ionogel <sup>31</sup>                  |
| 32  | 4.70              | --               | --                                 | BP@PVP ionogel <sup>32</sup>                                |
| 33  | 21.00             | 325.00           | 102                                | P(AA- <i>co</i> -AM)/Zn <sup>2+</sup> ionogel <sup>33</sup> |

91 **Table S4.** Tensile properties and conductivity of P(DMAAm<sub>40</sub>-co-AM<sub>60</sub>) ionogel under different  
92 humidity environments.

| <b>Humidity<br/>(%)</b> | <b>Tensile strength<br/>(MPa)</b> | <b>Elongation at break<br/>(%)</b> | <b>Conductivity<br/>(mS·cm<sup>-1</sup>)</b> |
|-------------------------|-----------------------------------|------------------------------------|----------------------------------------------|
| 0                       | 8.94                              | 404.46                             | 0.192                                        |
| 40                      | 0.420                             | 1456                               | 0.872                                        |
| 50                      | 0.051                             | >3500                              | 1.682                                        |
| 60                      | 0.038                             | >3300                              | 2.749                                        |

93

| Gel                                    | Stretchability |                       | Gauge factor                                        | Ref.             |
|----------------------------------------|----------------|-----------------------|-----------------------------------------------------|------------------|
|                                        | Tensile strain | Tensile strength(kPa) |                                                     |                  |
| PAM/SF/GO/PEDOT:PSS hydrogel           | 600%           | N/A                   | 0.8(0–50%)<br>1.6(50–400%)<br>0.6(400%–600%)        | 34               |
| GA/rGO/PAM hydrogel                    | 2094%          | 118.7                 | 2.496(0–40%)<br>3.957(40–100%)<br>15.467(100–1000%) | 35               |
| PVA-G-PDA-AgNPs hydrogel               | 331%           | 1174                  | 0.937(0–70%)<br>0.13(>70%)                          | 36               |
| PAA/CS/GO/Gly hydrogel                 | >1000%         | N/A                   | 1.138(0–80%)<br>4.7(>80%)                           | 37               |
| PAA/PDA-rGO/Fe <sup>3+</sup> hydrogel  | >600%          | 400                   | 1.32(100–500%)                                      | 38               |
| PVA/SA/MXene hydrogel                  | 263%           | ~100                  | 0.97(0–100%)                                        | 39               |
| MXene nanocomposite organohydrogel     | ~1000%         | ~50                   | 5.02(0–200%)<br>44.85(200–350%)                     | 40               |
| PAM/carrageenan/Eg/Gl organohydrogel   | N/A            | N/A                   | 1.9(0–200%)<br>6(250–400%)                          | 41               |
| P(AA-co-AM)/PDA-CNTs/Gl organohydrogel | ~800           | ~50                   | N/A                                                 | 42               |
| PVA/DMSO/rGO/GO organohydrogel         | ~600%          | 3100                  | 2.21(0–600%)                                        | 43               |
| PVA/PEDOT:PSS organohydrogel           | ~700%          | ~2100                 | N/A                                                 | 44               |
| PVA/PANI organohydrogel                | 458%           | 477                   | 2.14(0–100%)                                        | 45               |
| P(VDF-co-HFP)/P(MMA-co-BMA) ionogel    | 307%           | 2310                  | 1.62(0–150%)                                        | 46               |
| P(MEA-co-MTMA/TFSI) ionogel            | 1440%          | 1100                  | 0–7.3(0–400%)                                       | 47               |
| P(MEA-co-IBA) ionogel                  | 1400%          | 7120                  | 2.02 ( 1% )<br>2.02–4(1–100%)<br>4–6(100–200%)      | 23               |
| PAA/CNF/IL/H <sub>2</sub> O ionogel    | 11760%         | ~200                  | 0–9.8(0–2000%)                                      | 24               |
| PDMAA/Zn <sup>2+</sup> ionogel         | N/A            | 14300                 | 2.8(0–200%)<br>6.2(250–600%)<br>9.2(600–900%)       | 25               |
| <b>P(DMAAm-co-AM) ionogel</b>          | <b>404%</b>    | <b>8940</b>           | <b>2.73(0–10%)</b><br><b>0.67(10–200%)</b>          | <b>This work</b> |

94 Table S5. Comparison of sensing performance of gel-based flexible strain sensors.

95 **Reference**

- 96 1. N. Yuan, L. Xu, H. Wang, Y. Fu, Z. Zhang, L. Liu, C. Wang, J. Zhao and J. Rong, *ACS Appl.*  
97 *Mater. Inter.*, 2016, **8**, 34034-34044.
- 98 2. Y. Yang, X. Wang, F. Yang, L. Wang and D. Wu, *Adv. Mater.*, 2018, **30**, 1707071.
- 99 3. S. X. Pan, M. Xia, H. H. Li, X. L. Jiang, P. X. He, Z. G. Sun and Y. H. Zhang, *J. Mater. Chem.*  
100 *C*, 2020, **8**, 2827-2837.
- 101 4. S. H. Li, H. Y. Pan, Y. T. Wang and J. Q. Sun, *J. Mater. Chem. A*, 2020, **8**, 3667-3675.
- 102 5. T. Nakajima, Y. Fukuda, T. Kurokawa, T. Sakai, U. I. Chung and J. P. Gong, *ACS Macro Lett.*,  
103 2013, **2**, 518-521.
- 104 6. L. J. Zhou, X. J. Pei, K. Fang, R. Zhang and J. Fu, *Polymer*, 2020, **192**, 122319.
- 105 7. J. Wen, X. Zhang, M. Pan, J. Yuan, Z. Jia and L. Zhu, *Polymers*, 2020, **12**, (1), 239.
- 106 8. Y. Zhang, M. Y. Li, X. Han, Z. W. Fan, H. H. Zhang and Q. L. Li, *Chem. Phys. Lett.*, 2021, **769**,  
107 138437.
- 108 9. H. P. Yu and Y. J. Zhu, *Nano Res.*, 2021, **14**, 3643-3652.
- 109 10. H. Zhang, N. Tang, X. Yu, M. H. Li and J. Hu, *Adv. Funct. Mater.*, 2022, **32**, 2206305.
- 110 11. Q. Wu, S. Han, J. Zhu, A. Chen, J. Zhang, Z. Yan, J. Liu, J. Huang, X. Yang and L. Guan, *Chem.*  
111 *Eng. J.*, 2023, **454**, 140328.
- 112 12. M. W. Zhang, R. Yu, X. L. Tao, Y. Y. He, X. P. Li, F. Tian, X. Y. Chen and W. Huang, *Adv.*  
113 *Funct. Mater.*, 2022, **33**, 2208083.
- 114 13. T. Li, Y. Wang, S. Li, X. Liu and J. Sun, *Adv. Mater.*, 2020, **32**, 2002706.
- 115 14. P. Liu, D. F. Pei, Y. P. Wu, M. J. Li, X. H. Zhao and C. X. Li, *J. Mater. Chem. A*, 2022, **10**,  
116 25602-25610.
- 117 15. H. Wang, J. Xu, K. Li, Y. Dong, Z. Du and S. Wang, *J Mater. Chem. B*, 2022, **10**, 1301-1307.
- 118 16. L. Yang, L. Sun, H. Huang, W. Zhu, Y. Wang, Z. Wu, R. E. Neisiany, S. Gu and Z. You, *Adv Sci*,  
119 2023, **10**, 2207527.
- 120 17. G. D. Fan, K. K. Liu, H. Su, Y. Q. Luo, Y. Geng, L. Y. Chen, B. J. Wang, Z. P. Mao, X. F. Sui  
121 and X. L. Feng, *Chem. Eng. J.*, 2022, **434**, 134702.
- 122 18. L. Yu, S. Guo, Y. Lu, Y. Li, X. Lan, D. Wu, R. Li, S. Wu and X. Hu, *Adv. Energy Mater.*, 2019,  
123 **9**, 1900257.
- 124 19. Y. Zhao, D. L. Gan, L. C. Wang, S. Y. Wang, W. J. Wang, Q. Wang, J. J. Shao and X. C. Dong,  
125 *Adv. Mater. Tech.*, 2023, **8**, 2201566.
- 126 20. Y. Ren, J. Guo, Z. Liu, Z. Sun, Y. Wu, L. Liu and F Yan. *Sci. Adv.*, 2019, **5**, 0648.
- 127 21. Z. Yu and P. Wu, *Adv. Mater.*, 2021, **33**, 2008479.
- 128 22. M. Wang, P. Zhang, M. Shamsi, J. L. Thelen, W. Qian, V. K. Truong, J. Ma, J. Hu and M. D.  
129 Dickey, *Nat. Mater.*, 2022, **21**, 359-365.
- 130 23. B. Yiming, Y. Han, Z. Han, X. Zhang, Y. Li, W. Lian, M. Zhang, J. Yin, T. Sun, Z. Wu, T. Li, J.  
131 Fu, Z. Jia and S. Qu, *Adv. Mater.*, 2021, **33**, 2006111.
- 132 24. Y. H. Ye, H. Oguzlu, J. Y. Zhu, P. H. Zhu, P. Yang, Y. L. Zhu, Z. M. Wan, O. J. Rojas and F.  
133 Jiang, *Adv. Funct. Mater.*, 2023, **33**, 2209787.
- 134 25. L. Li, W. Li, X. Wang, X. Zou, S. Zheng, Z. Liu, Q. Li, Q. Xia and F. Yan, *Angew. Chem. Int. Ed.*  
135 *Engl.*, 2022, **61**, e202212512.

- 136 26. K. G. Cho, S. An, D. H. Cho, J. H. Kim, J. Nam, M. Kim and K. H. Lee, *Adv. Funct. Mater.*,  
137 2021, **31**, 2102386.
- 138 27. Z. Q. Cao, H. L. Liu and L. Jiang, *Mater. Horiz.*, 2020, **7**, 912-918.
- 139 28. Q. Xia, W. Li, X. Zou, S. Zheng, Z. Liu, L. Li and F. Yan, *Mater Horiz*, 2022, **9**, 2881-2892.
- 140 29. J. Chen, Y. Wang, L. Li, Y. E. Miao, X. Zhao, X. P. Yan, C. Zhang, W. Feng and T. Liu, *ACS*  
141 *Appl. Mater. Inter.*, 2023, **15**, 16109-16117.
- 142 30. S. Hao, C. Yang, X. Yang, T. Li, L. Ma, Y. Jiao and H. Song, *ACS Appl. Mater. Inter.*, 2023, **15**,  
143 16132-16143.
- 144 31. W. Q. Zhan, H. Q. Zhang, X. Lyu, Z. Z. Luo, Y. Yu and Z. G. Zou, *Sci. China Mater.*, 2023, **66**,  
145 1539-1550.
- 146 32. X. F. Xiao, H. D. Zhao, P. J. Yan, H. F. Zhang, X. H. Liu, X. Jia and S. P. Jin, *J. Mater. Chem.*  
147 *A*, 2023, **11**, 6616-6626.
- 148 33. Z. K. Huang, Y. T. Chen, J. P. Peng, T. R. Huang, F. Q. Hu, X. Liu, L. G. Xu and K. Yue, *J.*  
149 *Mater. Chem. A*, 2023, **11**, 7201-7212.
- 150 34. F. He, X. You, H. Gong, Y. Yang, T. Bai, W. Wang, W. Guo, X. Liu and M. Ye, *ACS Appl.*  
151 *Mater. Inter.*, 2020, **12**, 6442-6450.
- 152 35. X. Zheng, Y. Gao, X. Ren and G. Gao, *J Mater. Chem. C*, 2021, **9**, 3343-3351.
- 153 36. L. Fan, J. Xie, Y. Zheng, D. Wei, D. Yao, J. Zhang and T. Zhang, *ACS Appl. Mater. Inter.*, 2020,  
154 **12**, 22225-22236.
- 155 37. S. Xia, S. Song, Y. Li and G. Gao, *J Mater. Chem. C*, 2019, **7**, 11303-11314.
- 156 38. X. Jing, H. Y. Mi, X. F. Peng and L. S. Turng, *Carbon*, 2018, **136**, 63-72.
- 157 39. T. Wang, J. Wang, Z. Li, M. Yue, X. Qing, P. Zhang, X. Liao, Z. Fan and S. Yang, *J Appl. Polym.*  
158 *Sci.*, 2021, **139**, 51627.
- 159 40. H. Liao, X. L. Guo, P. B. Wan and G. H. Yu, *Adv. Funct. Mater.*, 2019, **29**, 1904507.
- 160 41. J. Wu, Z. Wu, X. Lu, S. Han, B. R. Yang, X. Gui, K. Tao, J. Miao and C. Liu, *ACS Appl. Mater.*  
161 *Inter.*, 2019, **11**, 9405-9414.
- 162 42. L. Han, K. Liu, M. Wang, K. Wang, L. Fang, H. Chen, J. Zhou and X. Lu, *Adv. Funct. Mater.*,  
163 2017, **28**, 1704195.
- 164 43. H. Chen, J. Huang, J. Liu, J. Gu, J. Zhu, B. Huang, J. Bai, J. Guo, X. Yang and L. Guan, *J. Mater.*  
165 *Chem. A*, 2021, **9**, 23243-23255.
- 166 44. Q. Rong, W. Lei, L. Chen, Y. Yin, J. Zhou and M. Liu, *Angew. Chem. Int. Ed. Engl.*, 2017, **56**,  
167 14159-14163.
- 168 45. C. X. Hu, Y. L. Zhang, X. D. Wang, L. Xing, L. Y. Shi and R. Ran, *ACS Appl. Mater. Inter.*,  
169 2018, **10**, 44000-44010.
- 170 46. J. Lan, Y. Li, B. Yan, C. Yin, R. Ran and L.-Y. Shi, *ACS Appl. Mater. Inter.*, 2020, **12**, 37597-  
171 37606.
- 172 47. C. He, S. Sun and P. Wu, *Mater. Horiz.*, 2021, **8**, 2088-2096.
- 173
- 174
